# Supplementary material for: Recombinant baculovirus expressing the FrC-OVA protein induces protective antitumor immunity in an EG7-OVA mouse model
Source: PubMed Central journal article supplement (PMC6805443; doi:10.1186/s13036-019-0207-y), 2019-10-22

## Supplementary Data

### Recombinant baculovirus expressing the FrC-OVA protein induces protective antitumor immunity in an EG7-OVA mouse model

Keigo Kondou, Tomoyuki Suzuki, Myint Oo Chang and Hiroshi Takaku

**Figure S1.** RT-PCR analysis FrC-OVA RNA expression in FrC-OVA-pAc-CAG-MCS2 and FrC-OVA-pVAX1-CAG-MCS. **(a,c)** Schematic maps of FrC-OVA-pAc-CAG-MCS2 and FrC-OVA-pVAX1-CAG-MCS plasmids. RT-PCR amplification products analyzed by 2% agarose gel electrophoresis with ethidium bromide staining. RT-PCR analysis of FrC-OVA RNA was carried out using FrC-OVA specific primers with concomitant amplification of GAPDH mRNA. Lane 1: MOCK; lane 2: PC; lane 3: FrC-OVA RNA expression in FrC-OVA-pAc-CAG-MCS2 **(b)** and FrC-OVA-pVAX1-CAG-MCS **(d)**.

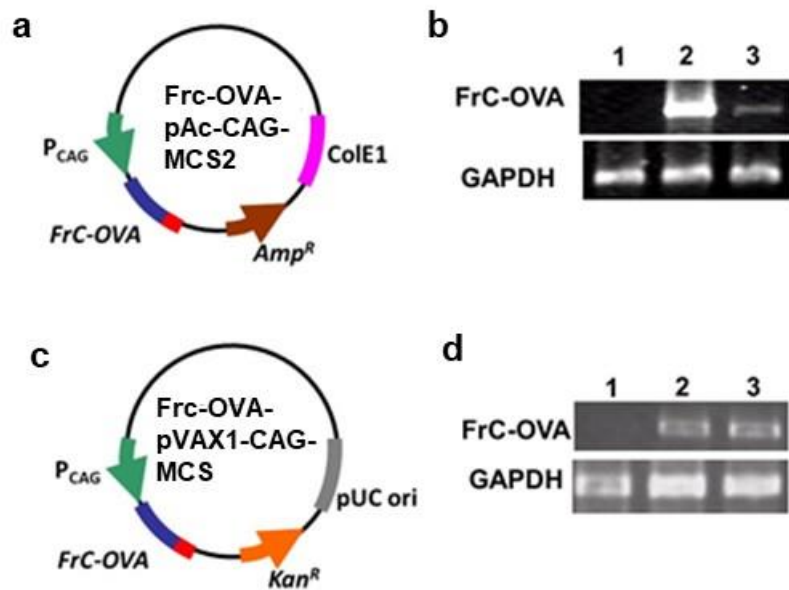

Supplement: 13036_2019_207_MOESM1_ESM.pdf [file 13036_2019_207_MOESM1_ESM.pdf]
